# Supplementary material for: Pro-Inflammatory Derangement of the Immuno-Interactome in Heart Failure
Source: Frontiers journal article supplement (doi:10.3389/fimmu.2022.817514), 2022-03-15
Supplement: Data_Sheet_1.PDF [file Data_Sheet_1.PDF]

## *Supplementary Material*

### **Supplementary Tables:**

**Table S1:** Clinical Information and demographics of human subjects

**Table S2:** Panel 1 Antibodies conjugated metal, clone and vendor information

**Table S3:** Panel 2 Antibodies conjugated metal, clone and vendor information

**Table S4:** Mean degree centrality of major immune cell subsets in HC and HF network

### **Supplementary Figures:**

**Figure S1: Marker expression overlaid on t-SNE map (Panel 1)**

Expression of indicated markers were overlaid on t-SNE map to shows the cellular phenotype ont-SNE map

**Figure S2: Marker expression overlaid on t-SNE map (Panel 2)**

Expression of indicated markers were overlaid on t-SNE map to shows the cellular phenotype ont-SNE map

**Figure S3: Elbow plot**

Within group of sum of square was plotted on y axis for increasing number of clusters on x-axis

**Figure S4: Degree Centrality of immune cell subsets**

Node degree centrality of HC and HF immunome network was plotted as bar graph. Color of graph shows the major cell lineage type

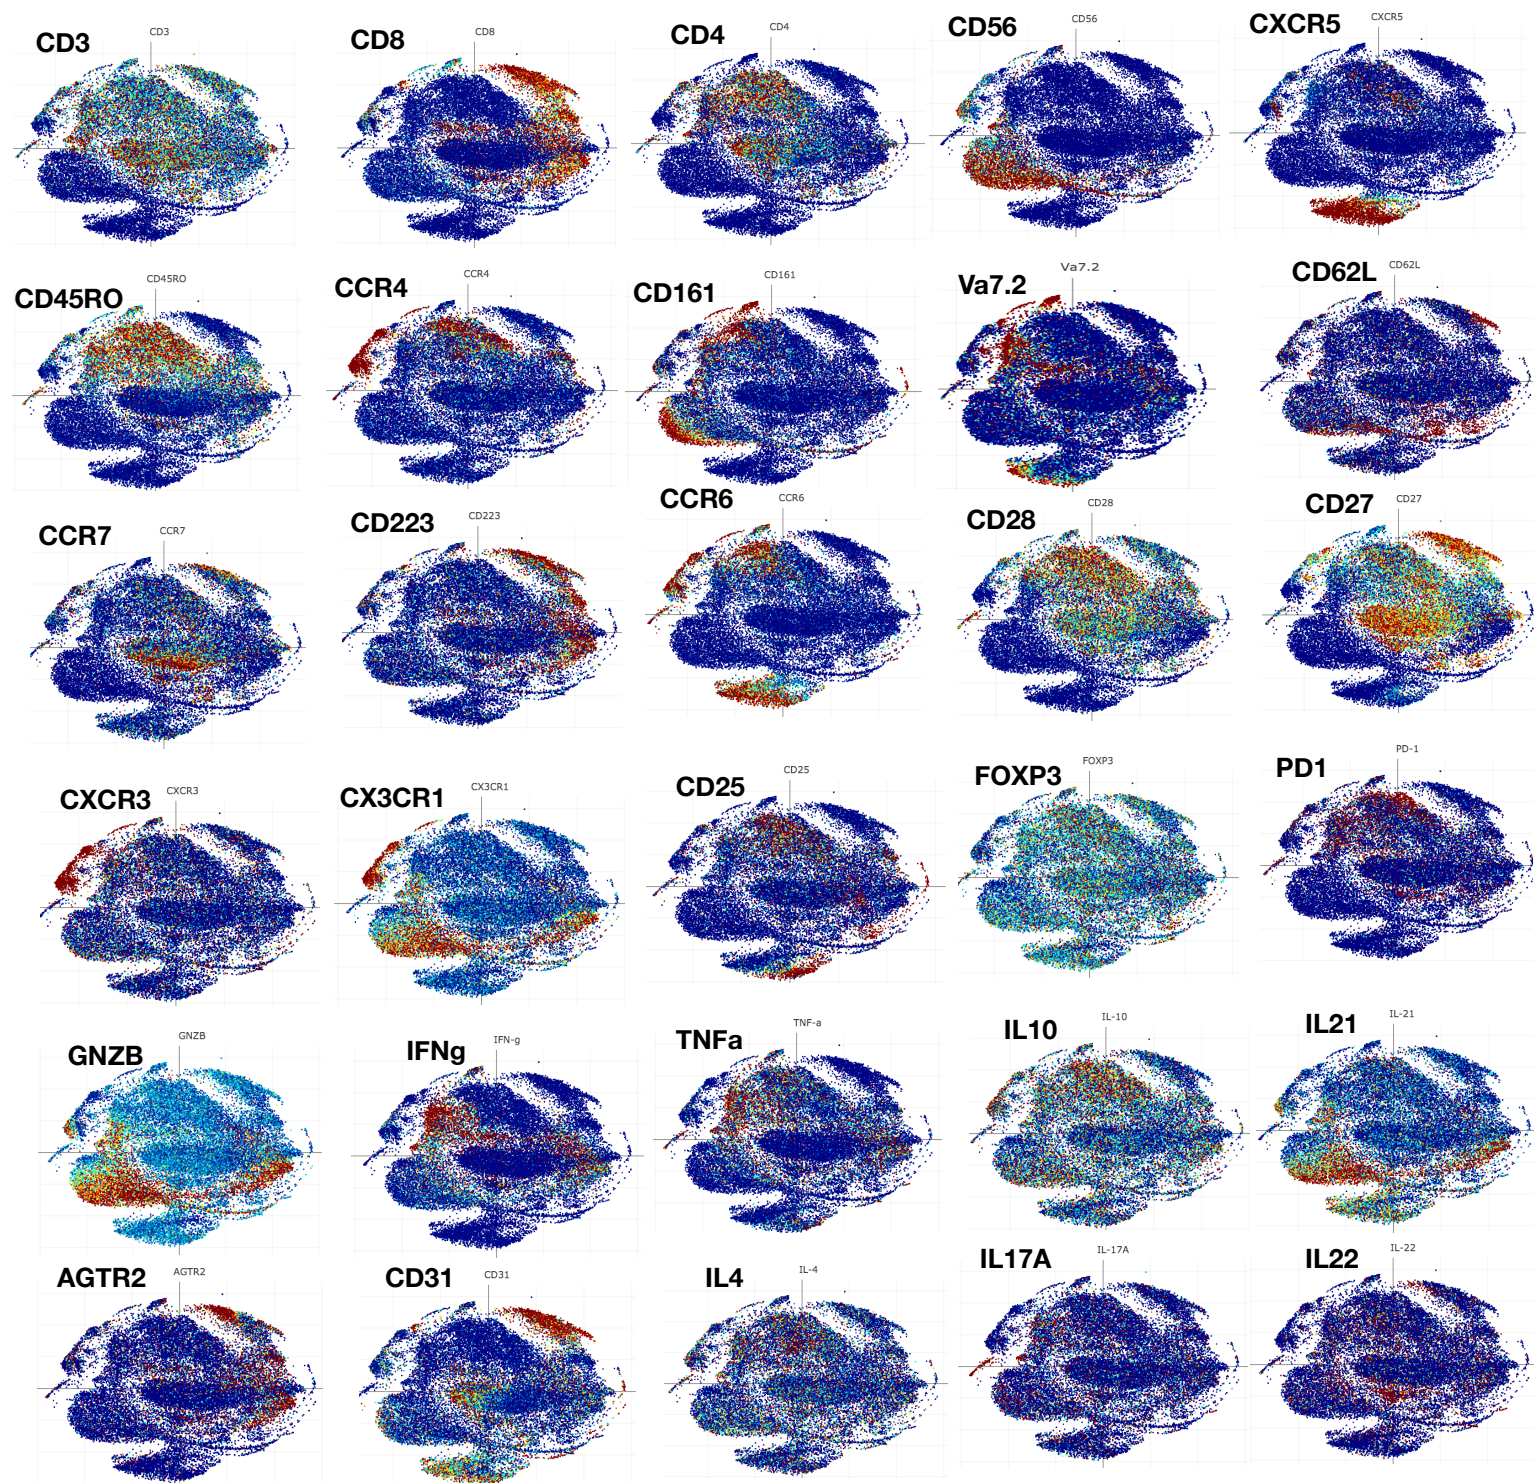

**Figure S1: Marker expression overlaid on t-SNE map (Panel 1)**

Expression of indicated markers were overlaid on t-SNE map to shows the cellular phenotype ont-SNE map



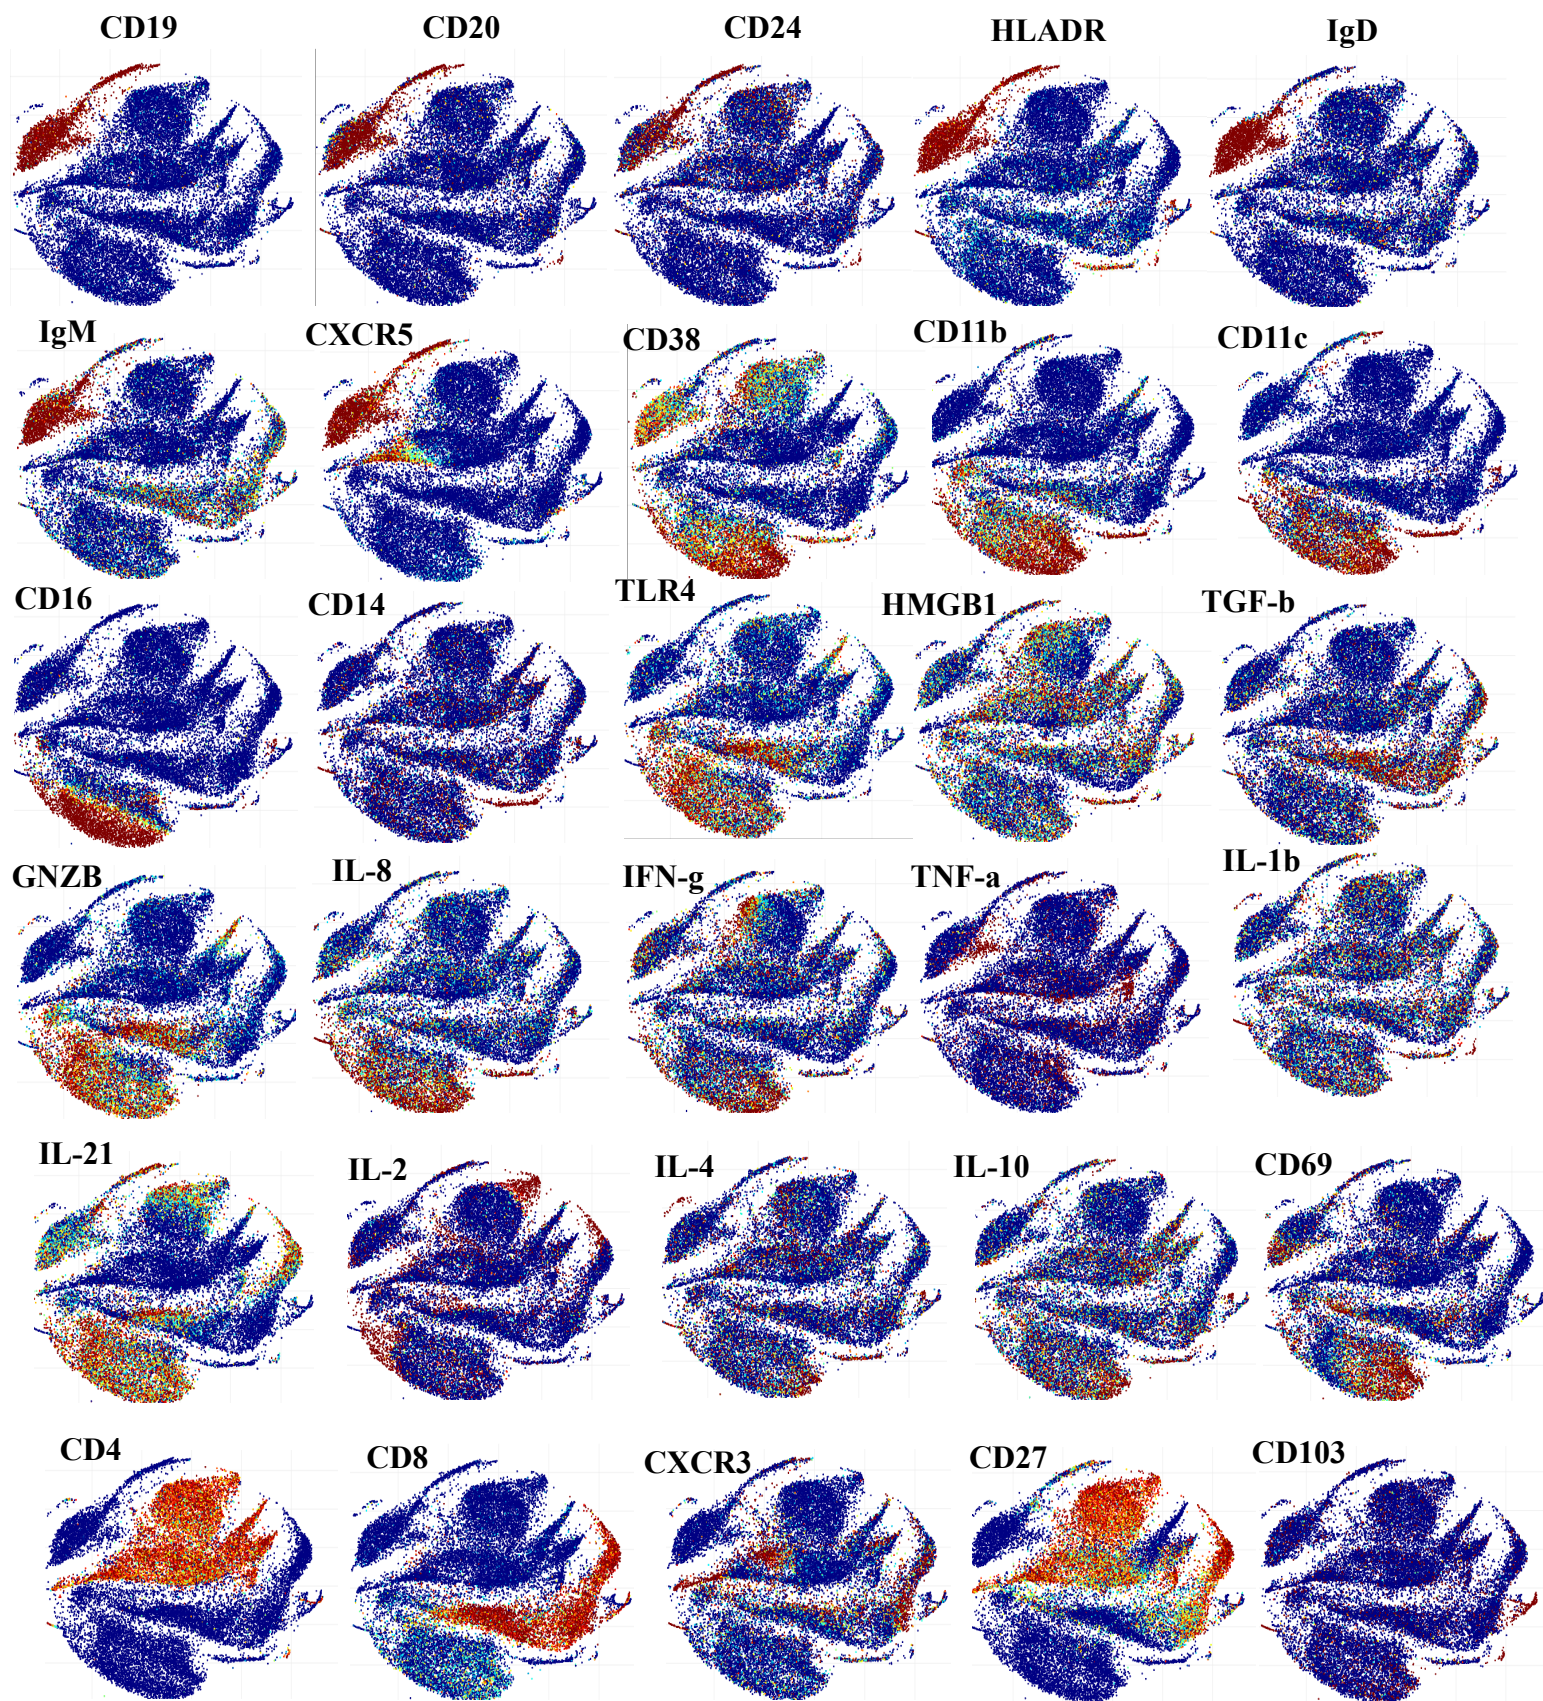

**Figure S2: Marker expression overlaid on t-SNE map (Panel 2)**

Expression of indicated markers were overlaid on t-SNE map to shows the cellular phenotype ont-SNE map

**A****Panel 1**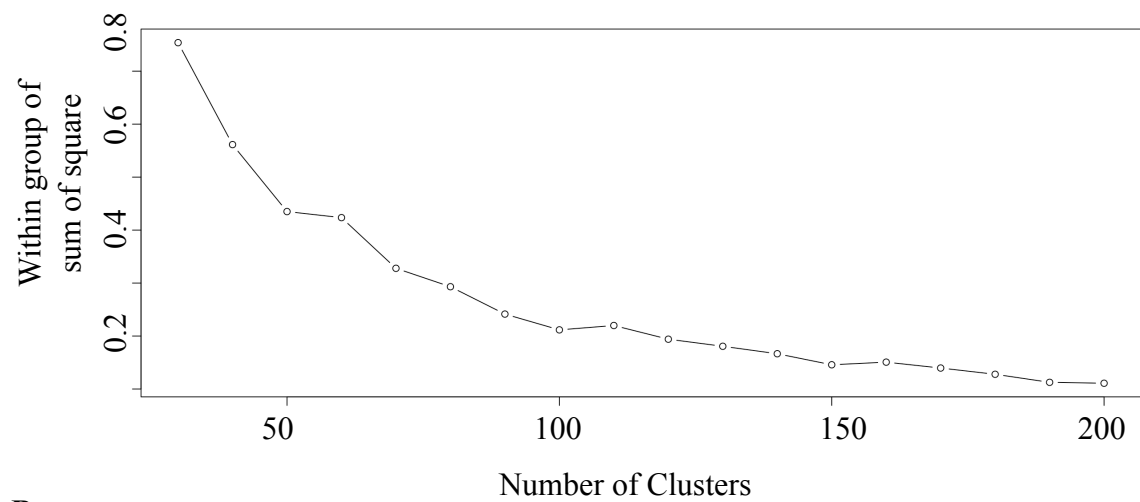**B****Panel 2**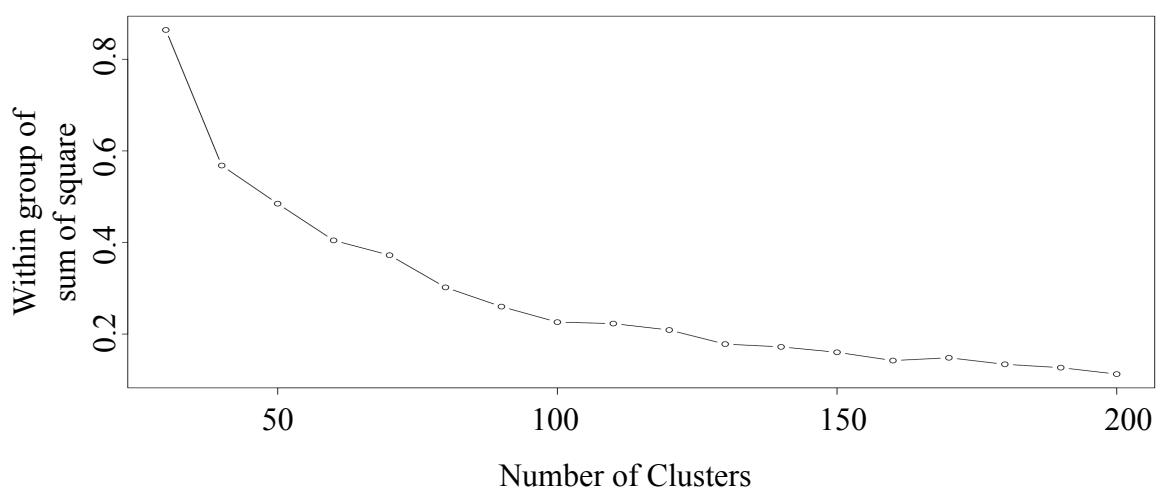**Figure S3: Elbow plot**

Within group of sum of square was plotted on y axis for increasing number of clusters on x-axis



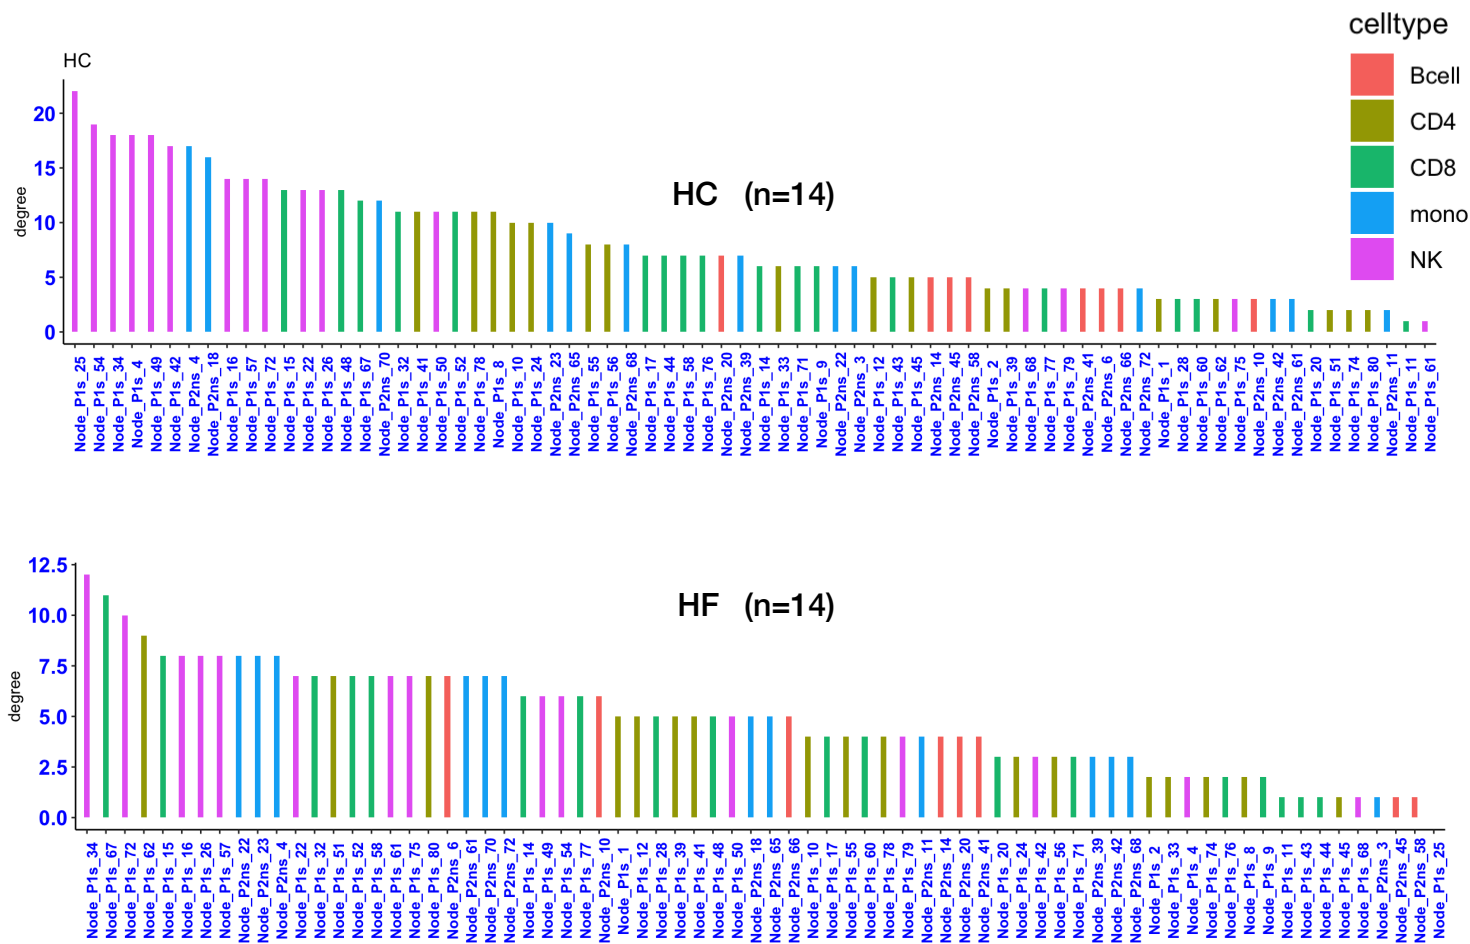

**Figure S4: Degree Centrality of immune cell subsets**

Node degree centrality of HC and HF immunome network was plotted as bar graph.

Color of graph shows the major cell lineage type
